# Supplementary material
Source: Elsevier journal article supplement (https://www.sciencedirect.com/science/article/pii/S2531043722000745)
Supplement: mmc1 [file S2531043722000745:mmc1.docx]

**ALPHA-1 ANTITRYPSIN DEFICIENCY, ASTHMA AND PREGNANCY. IS THERE A PLACE FOR AUGMENTATIVE THERAPY?**

José María Hernández Pérez y Claudia Vivian López Charry.

Department of Neumology . Universitary Hospital Nuestra Señora de Candelaria. Carretera del Rosario 145. 38710. Santa Cruz de Tenerife, España

**Conflicto de intereses:**

The author declares have no conflicts of interest related directly or indirectly to the contents of the manuscript.

**Fundings:**

The authors declare have not received funding to write this article.

**Autor de correspondencia:**

José María Hernández Pérez

Universitary Hospital Nuestra Señora de Candelaria. Carretera del Rosario 145. 38710. Santa Cruz de Tenerife, España

Telephone: +34 922600576

E-mail: jmherper@hotmail.com
